# Supplementary material
Source: bioRxiv or medRxiv preprint supplement (https://www.biorxiv.org/highwire/filestream/82684/field_highwire_adjunct_files/8/269498-7.pdf)

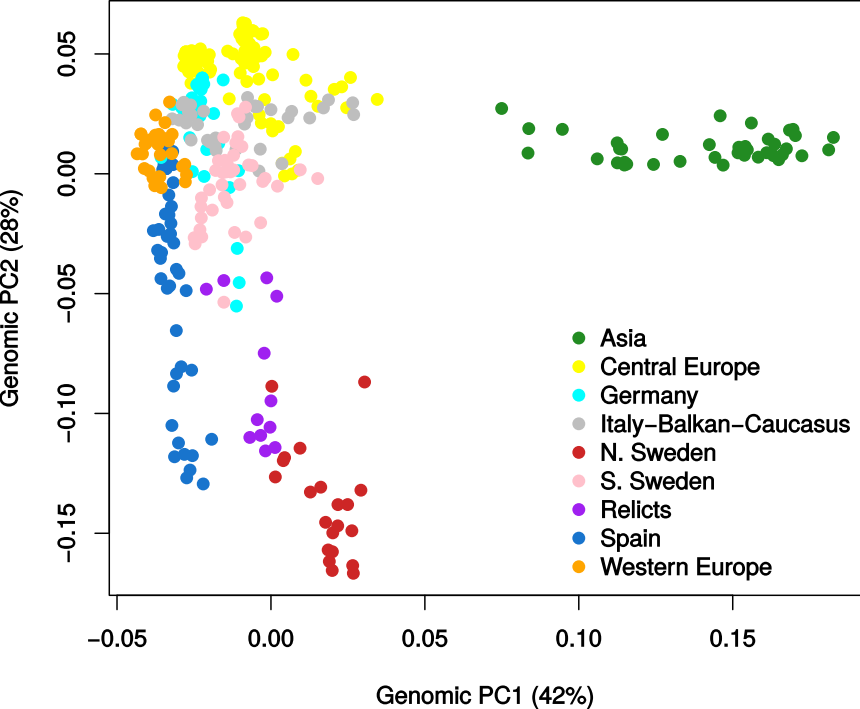

Supplement: Supplementary file [file 269498-7.pdf]
